# Supplementary material
Source: Springer Nature journal article supplement (https://www.springermedizin.de/resource/supplementary/12889_2011_3441_MOESM3_ESM.pdf/9489044)
Supplement: MOESM3 [file 9489044]

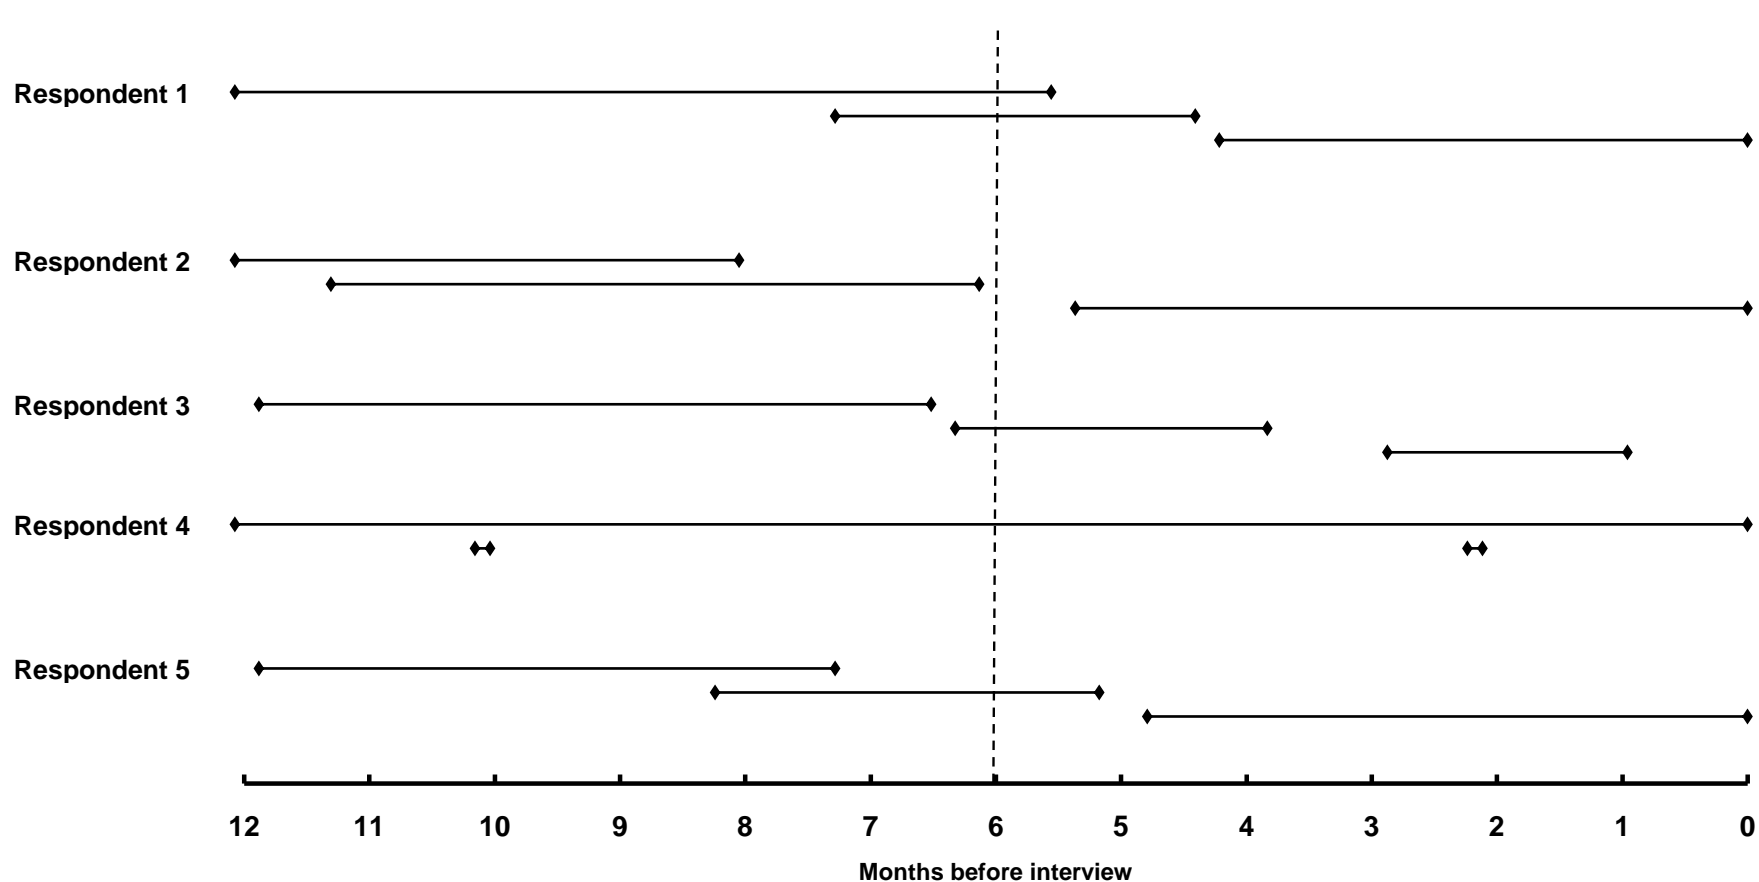

Dates of first and last sex with last three partners in last 12 months, for 5 hypothetical respondents. Concurrency is defined as sustained overlapping sexual partnerships in which sexual intercourse with one partner occurs between two acts with another partner. It excludes one-off sexual encounters with other partners.

**Point prevalence of concurrency at 6 months before the interview**, the main indicator of concurrency in a population, is 1/5 (20%). Respondent 1 is only participant in a concurrent partnership 6 months before the interview (dashed line).

A secondary indicator is **cumulative prevalence in the past 12 months**, which is 3/5 (60%) – Respondents 1, 2 and 5 were in a concurrent partnership in the past 12 months.

Respondent 4 reported one partnership that began 12 months ago and was still ongoing, and two partners with whom they had sex only once (at 10m and 2m before the interview) – these are not considered concurrent
